# Supplementary material for: Spectroelectrochemical evidence for communication within a laterally-bridged dimanganese(iii) bis-porphyrin
Source: Royal Society of Chemistry journal article supplement (doi:10.1039/b607748j), 2006-01-01
Supplement: b607748j.pdf [file b607748j.pdf]

Electronic Supplementary Information for Dalton Transactions  
This journal is © The Royal Society of Chemistry 2006

**Spectroelectrochemical evidence for communication within a  
laterally-bridged di-manganese(III) bis-porphyrin**

**Robert S. Armstrong, Garry J. Foran, Warren A. Hough, Deanna M. D'Alessandro,  
Peter A. Lay and Maxwell J. Crossley**

**Table S1** Redox potentials of **2** (vs the  $\text{Fc}^+/\text{Fc}$  couple) measured using cyclic voltammetry at Pt working electrode.<sup>a</sup>

| CV Peak positions |              | $E_{1/2}$<br>/mV | Scan rate<br>/mVs <sup>-1</sup> |
|-------------------|--------------|------------------|---------------------------------|
| Cathodic          | Anodic       |                  |                                 |
| ~ -310            | <sup>b</sup> |                  | 200                             |
| -890              | -820         | -855             | 200                             |
| -1070             | -1005        | -1037            | 200                             |
| -1310             | ~ -1230      | -1270            | 200                             |
|                   |              |                  |                                 |
| -920              | -823         | -871             | 400                             |
| -1097             | -1007        | -1052            | 400                             |
|                   |              |                  |                                 |
| 1067              | 1147         | 1107             | 400                             |

<sup>a</sup> No  $iR$  compensation was applied.

<sup>b</sup> No anodic peak was observed for this couple.

**Table S2** Electronic absorption band positions ( $\times 10^{-3} \text{ cm}^{-1}$ ) and molar absorption coefficients ( $\times 10^{-4} \text{ M}^{-1} \text{ cm}^{-1}$ ) for dicopper(II) and dizinc(II) bis-porphyrins.

| bis-porphyrin                                 | Soret bands                | Q bands                                  |
|-----------------------------------------------|----------------------------|------------------------------------------|
| $\text{Cu}^{\text{II}}-\text{Cu}^{\text{II}}$ | 23.58 (5.50), 22.03 (5.40) | 19.42 (4.84), 18.62 (4.84), 14.90 (4.40) |
| $\text{Zn}^{\text{II}}-\text{Zn}^{\text{II}}$ | 23.26 (5.54), 21.60 (5.52) | 19.08 (4.85), 14.99 (4.33), 14.18 (4.30) |

**Table S3** Correlation table for a change in symmetry from  $D_{4h}$  to  $D_{2h}$ ,  $C_{2v}$ ,  $C_{2h}$  and  $C_s$ .

| Molecular Symmetry |          |          |          |       |
|--------------------|----------|----------|----------|-------|
| $D_{4h}$           | $D_{2h}$ | $C_{2v}$ | $C_{2h}$ | $C_s$ |
| $a_{1g}$           | $a_g$    | $a_1$    | $a_g$    | $a'$  |
| $a_{2g}$           | $b_{1g}$ | $a_2$    | $b_g$    | $a''$ |
| $b_{1g}$           | $a_g$    | $a_1$    | $a_g$    | $a'$  |
| $b_{2g}$           | $b_{1g}$ | $a_2$    | $b_g$    | $a''$ |
| $e_g$              | $b_{2g}$ | $b_1$    | $b_g$    | $a''$ |
|                    | $b_{3g}$ | $b_2$    | $a_g$    | $a'$  |
| $a_{1u}$           | $a_u$    | $a_2$    | $a_u$    | $a''$ |
| $a_{2u}$           | $b_{1u}$ | $a_1$    | $b_u$    | $a'$  |
| $b_{1u}$           | $a_u$    | $a_2$    | $a_u$    | $a''$ |
| $b_{2u}$           | $b_{1u}$ | $a_1$    | $b_u$    | $a'$  |
| $e_u$              | $b_{2u}$ | $b_2$    | $b_u$    | $a'$  |
|                    | $b_{3u}$ | $b_1$    | $a_u$    | $a''$ |

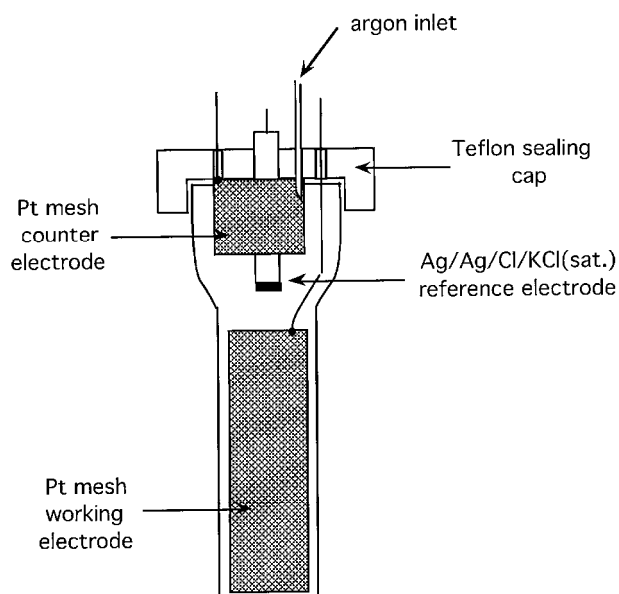

**Fig. S1** Schematic representation of the UV-Vis spectroelectrochemical cell.

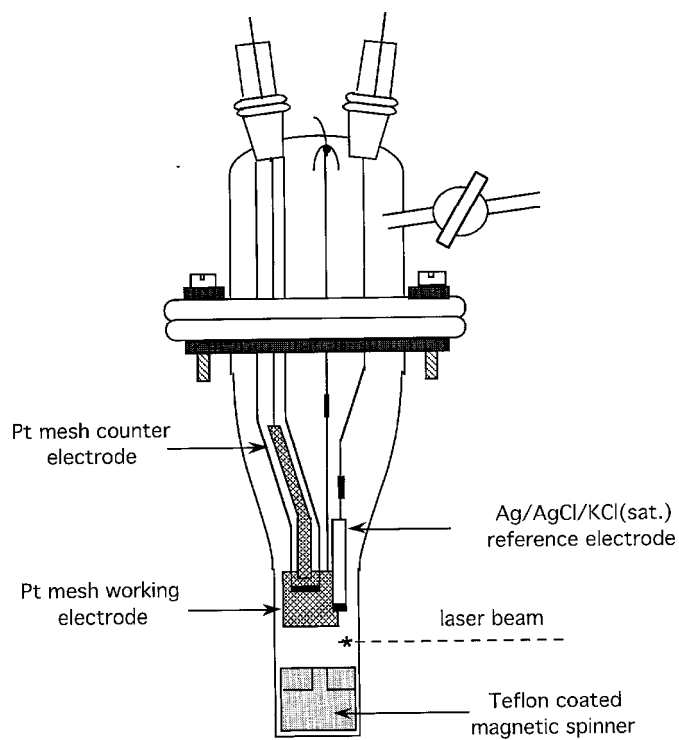

**Fig. S2(a)** Spectroelectrochemical Raman cell.

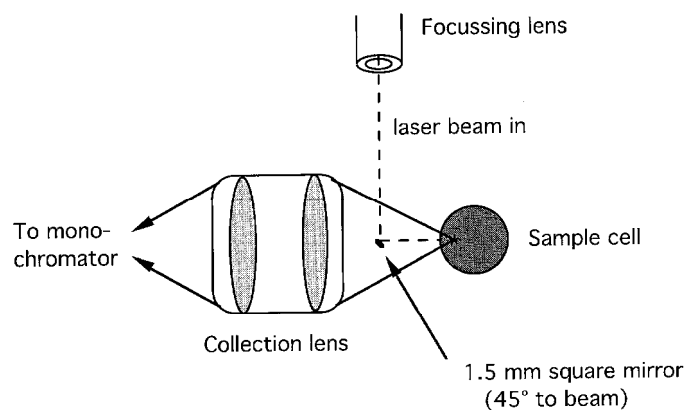

**Fig. S2(b)** Backscattering arrangement of the spectroelectrochemical Raman cell.

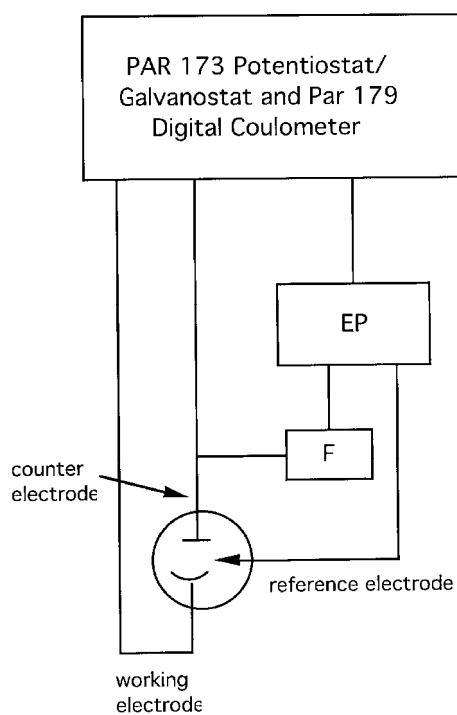

**Fig. S2(c)** Schematic representation of the electrochemical setup for bulk electrolysis. EP = electrometer probe and F = electrical filter.

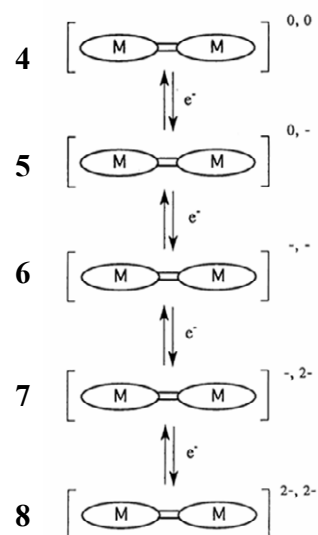

**Fig. S3** The four electron transfer processes for bis-porphyrin complexes (drawn here in an abbreviated depiction), either in the free-base form or containing metal ions such as Mn(II), Cu(II) or Zn(II).

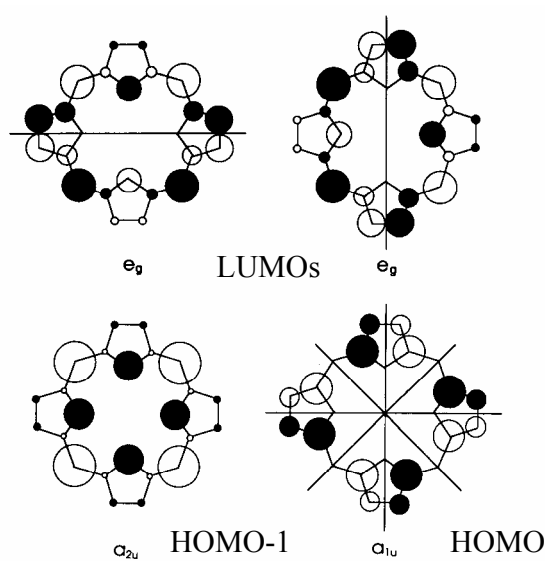

**Fig. S4** Gouterman's four orbital model for simple porphyrin. Schematic representation of the two highest occupied molecular orbitals (HOMOs:  $a_{1u}$  and  $a_{2u}$ ) and a degenerate pair of lowest unoccupied molecular orbitals (LUMOs). Reproduced from reference 12.

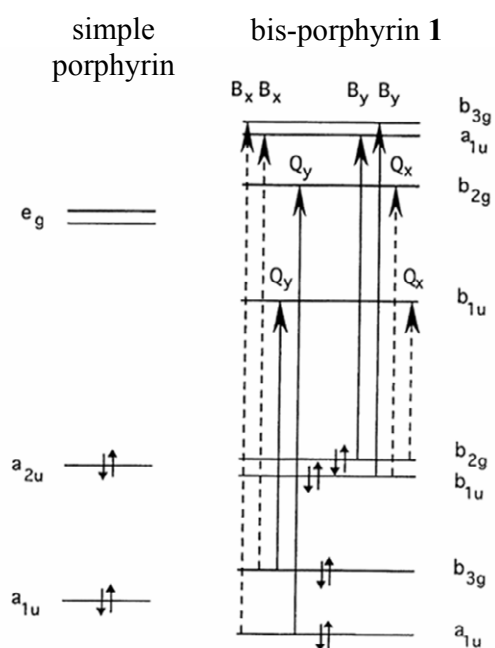

**Fig. S5** Molecular orbital diagram and allowed transitions of simple porphyrin and free-base bis-porphyrin **1** as determined by extended Hückel calculations. Solid arrows represent  $y$ -polarised transitions and dashed arrows represent  $x$ -polarised transitions.
